# Supplementary material
Source: PubMed Central journal article supplement (PMC3921591)
Supplement: cdd2013163x2.pdf [file cdd2013163x2.pdf]

**Table 1. Sequence Information for Oligonucleotides Used. (Supplementary)**

| <b>Name</b>      | <b>Forward</b>                 | <b>Reverse</b>                 |
|------------------|--------------------------------|--------------------------------|
| <i>huMUC2</i>    | CCGCTGGAGCCGTATCTGCG           | CGGGGCAGGGCAGGTCTTTG           |
| <i>huDUSP10</i>  | GATCAGCCGGCGGAGACTGC           | CAGCCGCTGCATGGTGCCA            |
| <i>huPKG2</i>    | AGCCCGCTTCAGGCCTCT CC          | AGTCGACCCTCTGCCAGCAC           |
| <i>huSLC15A2</i> | CTCCAGGCAGCTTGGCTATT           | AAGACAGGGCCAGGAATTGG           |
| <i>huSI</i>      | CCCAACAGAGGGAATTTGTGCACAGAGAGG | GGAAGACGGGTTGAGATCTGTAAGTACTGG |
| <i>musDUSP10</i> | TTGATGCGAATGAGACCCACTTCTC      | AGGTGTGAGGCGAGCCGAGT           |
| <i>musPKG2</i>   | GTGGCGGAGGACCCAAGAC            | AGGCCTGCAGTGG GCTTCCT          |
| <i>HPRT1</i>     | GCGTCGTGATTAGCGATGATGAAC       | CCTCCCATCTCCTTCATGACATCT       |
| <i>Si-Ctrl</i>   | UUCCCUUCACCGACUUUCC            | GGAAAGUCGGUGAAGGGAA            |
| <i>Si-181</i>    | AAAGGUUGAGAUCUGAGGTT           | CCUCAGGAUCUCAACCUUUTT          |
| <i>Si-468</i>    | AUUAUUGUUGACCAUCUGGTT          | CCAGAUGGUCAACAAUAAUTT          |
