# Supplementary material
Source: PubMed Central journal article supplement (PMC3921591)
Supplement: cdd2013163x3.pdf [file cdd2013163x3.pdf]

**Table 2. Summary of cDNA array data analysis. (Supplementary)**

|                                        | p-value      | Fold decrease (vs WT) | Gene Symbol                                              | Gene Assignment                                                                |
|----------------------------------------|--------------|-----------------------|----------------------------------------------------------|--------------------------------------------------------------------------------|
| <b>Genes down-regulated in KO mice</b> | <b>0.001</b> | <b>4.51</b>           | <b>Prkg2</b>                                             | <b>protein kinase, cGMP-dependent, type II</b>                                 |
|                                        | <b>0.010</b> | <b>2.14</b>           | <b>Slc15a2</b>                                           | <b>solute carrier family 15 (H+/peptide transporter), membe</b>                |
|                                        | <b>0.039</b> | <b>2.04</b>           | <b>Cldn4</b>                                             | <b>claudin 4, tight junction</b>                                               |
|                                        | 0.000        | 1.63                  | Sprr2j                                                   | small proline-rich protein 2J                                                  |
|                                        | <b>0.040</b> | <b>1.58</b>           | <b>Olf1310</b>                                           | <b>olfactory receptor 1310</b>                                                 |
|                                        | 0.007        | 1.58                  | EG382156                                                 | predicted gene, EG382156                                                       |
|                                        | 0.007        | 1.56                  | Trim13                                                   | tripartite motif-containing 13                                                 |
|                                        | <b>0.005</b> | <b>1.55</b>           | <b>Dusp10</b>                                            | <b>dual specificity phosphatase 10</b>                                         |
|                                        | 0.035        | 1.55                  | Mt2                                                      | metallothionein 2                                                              |
|                                        | <b>0.043</b> | <b>1.55</b>           | <b>Myef2</b>                                             | <b>myelin basic protein expression factor 2, brain muscle differentiation</b>  |
|                                        | 0.049        | 1.54                  | Ppm1j                                                    | protein phosphatase 1J                                                         |
|                                        | <b>0.033</b> | <b>1.52</b>           | <b>Efna3</b>                                             | <b>ephrin A3</b>                                                               |
|                                        | <b>0.018</b> | <b>1.50</b>           | <b>Ifrd1</b>                                             | <b>interferon-related developmental regulator 1, differentiation in muscle</b> |
|                                        | 0.007        | 1.50                  | Il1rl2                                                   | interleukin 1 receptor-like 2                                                  |
|                                        | <b>0.040</b> | <b>1.48</b>           | <b>Adh6b</b>                                             | <b>alcohol dehydrogenase 6B (class V)</b>                                      |
|                                        | 0.014        | 1.44                  | Xirp2                                                    | xin actin-binding repeat containing 2                                          |
|                                        | 0.025        | 1.43                  | Tacstd2                                                  | tumor-associated calcium signal transducer 2                                   |
|                                        | 0.032        | 1.41                  | Arl4a                                                    | ADP-ribosylation factor-like 4A                                                |
|                                        | <b>0.027</b> | <b>1.41</b>           | <b>Ddc</b>                                               | <b>dopa decarboxylase, serotonin synthesis</b>                                 |
|                                        | <b>0.036</b> | <b>1.41</b>           | <b>Olf24</b>                                             | <b>olfactory receptor 24</b>                                                   |
| <b>0.004</b>                           | <b>1.40</b>  | <b>Ddi1</b>           | <b>DNA-damage inducible 1, homolog 1 (S. cerevisiae)</b> |                                                                                |
| <b>0.013</b>                           | <b>1.39</b>  | <b>Olf958</b>         | <b>olfactory receptor 958</b>                            |                                                                                |
| <b>0.048</b>                           | <b>1.38</b>  | <b>Best2</b>          | <b>bestrophin 2, calcium activated chloride channel</b>  |                                                                                |
| <b>0.014</b>                           | <b>1.36</b>  | <b>Olf521</b>         | <b>olfactory receptor 521</b>                            |                                                                                |
|                                        | p-value      | Fold increase (vs WT) | Gene Symbol                                              | Gene Assignment                                                                |
| <b>Genes up-regulated in KO mice</b>   | <b>0.031</b> | <b>1.75</b>           | <b>Nap1l2</b>                                            | <b>nucleosome assembly protein 1-like 2</b>                                    |
|                                        | 0.016        | 1.72                  | Pgk1                                                     | phosphoglycerate kinase 1                                                      |
|                                        | 0.005        | 1.72                  | Cma2                                                     | chymase 2, mast cell                                                           |
|                                        | 0.048        | 1.58                  | Gng3                                                     | G protein, gamma 3                                                             |
|                                        | <b>0.024</b> | <b>1.55</b>           | <b>Hist1h2ab</b>                                         | <b>histone cluster 1, H2ab</b>                                                 |
|                                        | 0.037        | 1.51                  | Clca4                                                    | chloride channel calcium activated 4                                           |
|                                        | <b>0.045</b> | <b>1.51</b>           | <b>Nusap1</b>                                            | <b>nucleolar and spindle associated protein 1</b>                              |
|                                        | <b>0.014</b> | <b>1.50</b>           | <b>Rab18</b>                                             | <b>RAB18, member RAS oncogene family</b>                                       |
|                                        | <b>0.037</b> | <b>1.49</b>           | <b>Ccna2</b>                                             | <b>cyclin A2</b>                                                               |
|                                        | 0.021        | 1.47                  | Kprp                                                     | keratinocyte expressed, proline-rich                                           |
|                                        | 0.009        | 1.45                  | Mak16                                                    | MAK16 homolog (S. cerevisiae), mutation casue G1 arrest                        |
|                                        | <b>0.039</b> | <b>1.43</b>           | <b>Kdelr3</b>                                            | <b>KDEL (Lys-Asp-Glu-Leu) endoplasmic reticulum protein rete</b>               |
|                                        | 0.017        | 1.43                  | Ccl28                                                    | chemokine (C-C motif) ligand 28                                                |
|                                        | 0.040        | 1.42                  | Ly9                                                      | lymphocyte antigen 9                                                           |
|                                        | <b>0.022</b> | <b>1.42</b>           | <b>Zfp804a</b>                                           | <b>zinc finger protein 804A, activated by HOXC8</b>                            |
|                                        | <b>0.043</b> | <b>1.41</b>           | <b>Rab3c</b>                                             | <b>RAB3C, member RAS oncogene family</b>                                       |
|                                        | <b>0.022</b> | <b>1.40</b>           | <b>Rps6ka6</b>                                           | <b>ribosomal protein S6 kinase polypeptide 6</b>                               |
|                                        | <b>0.024</b> | <b>1.38</b>           | <b>Kif11</b>                                             | <b>kinesin family member 11, mitosis</b>                                       |
|                                        | 0.046        | 1.38                  | Lcp2                                                     | lymphocyte cytosolic protein 2                                                 |
|                                        | 0.036        | 1.38                  | Prune2                                                   | prune homolog 2 (Drosophila)                                                   |
|                                        | 0.014        | 1.37                  | Khdc1a                                                   | KH domain containing 1A                                                        |
|                                        | 0.040        | 1.37                  | 434166                                                   | predicted gene, 434166                                                         |
|                                        | 0.021        | 1.37                  | Scgn                                                     | secretagogin, EF-hand calcium binding protein                                  |
| <b>0.030</b>                           | <b>1.37</b>  | <b>Ccnb1</b>          | <b>cyclin B1</b>                                         |                                                                                |
| 0.011                                  | 1.36         | Mirhg1                | microRNA host gene 1                                     |                                                                                |

Total RNA was extracted from the proximal colon mucosa from three *Prkg2*<sup>-/-</sup> and three *Prkg2*<sup>+/+</sup> mice. Labeling, hybridization to Affimetrix GeneChip Mouse Genome Array, quantitation and statistical analysis of gene expression were all performed by the Genomics Core facility at the Georgia Regents University Cancer Center. Genes marked by bold-face were related to differentiation (downregulated) or proliferation (upregulated) using Panther Analysis Software (<http://www.pantherdb.org>).

## **Supplementary Table 2**
