# Supplementary material
Source: PubMed Central journal article supplement (PMC3921591)

**A**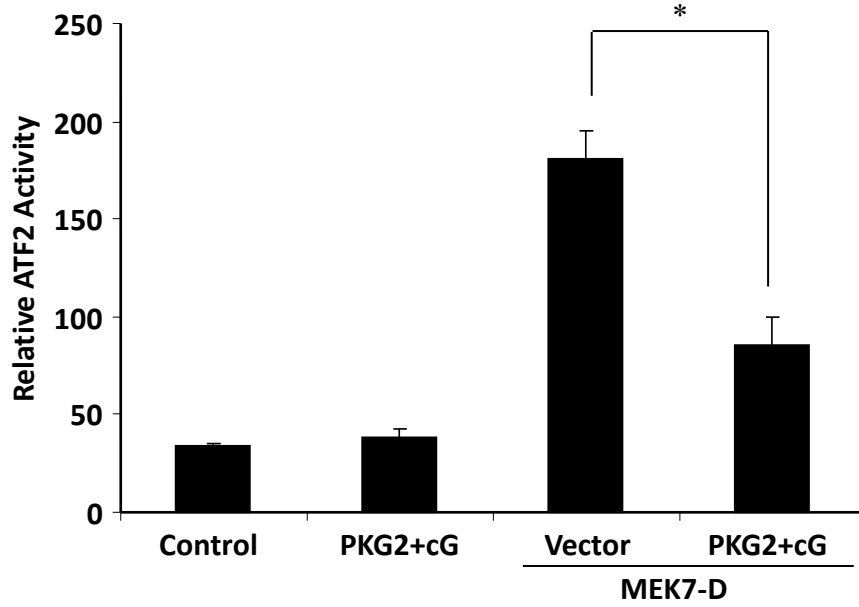**B**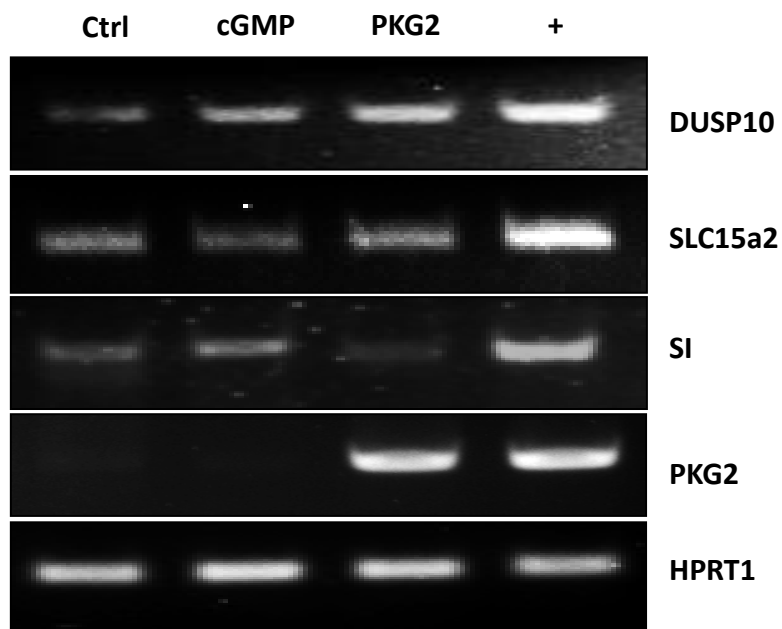

Supplement: cdd2013163x1.pdf [file cdd2013163x1.pdf]
